# Supplementary material
Source: PubMed Central journal article supplement (PMC2836598)
Supplement: NIHMS175426-supplement-1_si_002.pdf [file NIHMS175426-supplement-1_si_002.pdf]

# Conformational Preferences of $\beta$ - and $\gamma$ -Aminated Proline Analogues

Alejandra Flores-Ortega,<sup>1</sup> Jordi Casanovas<sup>2,\*</sup>

Ruth Nussinov,<sup>3,4</sup> and Carlos Alemán,<sup>1,\*</sup>

<sup>1</sup> *Departament d'Enginyeria Química, E. T. S. d'Enginyeria Industrial de  
Barcelona, Universitat Politècnica de Catalunya,  
Avda. Diagonal n° 647, 08028 Barcelona, Spain*

<sup>2</sup> *Departament de Química, Escola Politècnica Superior, Universitat de Lleida,  
c/Jaume II n° 69, 25001 Lleida, Spain*

<sup>3</sup> *Basic Research Program, SAIC-Frederick, Inc. Center for Cancer Research  
Nanobiology Program, NCI, Frederick, MD 21702, USA*

<sup>4</sup> *Department of Human Genetics Sackler, Medical School, Tel Aviv University, Tel  
Aviv 69978, Israel*

|          | Pages  | Contents                                                                                                                    |
|----------|--------|-----------------------------------------------------------------------------------------------------------------------------|
| Table S1 | S2-S2  | Structural and energy parameters of Ac-Pro-NHMe                                                                             |
| Table S2 | S3-S13 | Coordinates and energies of Ac- $\beta$ tAmp-NHMe, Ac- $\beta$ cAmp-NHMe, Ac- $\gamma$ tAmp-NHMe and Ac- $\gamma$ cAmp-NHMe |

**Table S1. Backbone dihedral angles (in degrees), pseudorotational parameters (A and P; in degrees) and relative energy ( $\Delta E^{\text{sp}}$ ; in kcal/mol) and free energy ( $\Delta G^{\text{sp}}$ ; in kcal/mol) of the minimum energy conformations characterized for Ac-L-Pro-NHMe at the B3LYP/6-31+G(d,p) level in the gas phase. These structural and energy parameters have been taken from *J. Org. Chem.* **2008**, *73*, 3418**

| # Conf.                         | $\omega_0$ | $\varphi$ | $\psi$ | $\omega$ | (A, P)                      | $\Delta E^{\text{sp}}$ | $\Delta G^{\text{sp}}$ |
|---------------------------------|------------|-----------|--------|----------|-----------------------------|------------------------|------------------------|
| t- $\gamma_{\text{L}}$ [d]      | -172.6     | -83.4     | 70.3   | -177.7   | (37.4, -111.9) <sup>a</sup> | 0.0 <sup>b</sup>       | 0.0 <sup>c</sup>       |
| t- $\gamma_{\text{L}}$ [u]      | -173.9     | -81.6     | 77.3   | -175.9   | (37.5, 75.8) <sup>d</sup>   | 1.0                    | 1.3                    |
| t- $\alpha_{\text{L}}$ [u]      | -171.0     | -77.5     | -11.5  | 175.9    | (37.8, 89.2) <sup>e</sup>   | 4.9                    | 4.0                    |
| c- $\alpha_{\text{L}}$ [d]      | 10.2       | -90.9     | -5.1   | -179.6   | (37.5, -111.5) <sup>f</sup> | 3.3                    | 2.3                    |
| c- $\alpha_{\text{L}}$ [u]      | 8.0        | -79.2     | -18.4  | -177.1   | (37.5, 90.1) <sup>g</sup>   | 4.2                    | 3.6                    |
| c- $\varepsilon_{\text{L}}$ [d] | 1.2        | -75.2     | 147.9  | 174.6    | (36.8, -114.4) <sup>h</sup> | 6.3                    | 4.8                    |
| c- $\varepsilon_{\text{L}}$ [u] | -0.1       | -61.2     | 145.3  | 177.5    | (37.4, 88.0) <sup>i</sup>   | 6.6                    | 5.0                    |

<sup>a</sup>  $\chi^0 = -13.9^\circ$ ,  $\chi^1 = 31.4^\circ$ ,  $\chi^2 = -37.6^\circ$ ,  $\chi^3 = 28.7^\circ$  and  $\chi^4 = -9.3^\circ$ . <sup>b</sup> E = -573.315217 a.u. <sup>c</sup> G = -573.132049 a.u. <sup>d</sup>  $\chi^0 = -10.3^\circ$ ,  $\chi^1 = -13.4^\circ$ ,  $\chi^2 = 31.0^\circ$ ,  $\chi^3 = -36.6^\circ$  and  $\chi^4 = 29.8^\circ$ . <sup>e</sup>  $\chi^0 = 0.5^\circ$ ,  $\chi^1 = -22.9^\circ$ ,  $\chi^2 = 36.1^\circ$ ,  $\chi^3 = -35.4^\circ$  and  $\chi^4 = 22.0^\circ$ . <sup>f</sup>  $\chi^0 = -13.8^\circ$ ,  $\chi^1 = 31.4^\circ$ ,  $\chi^2 = -37.6^\circ$ ,  $\chi^3 = 29.0^\circ$  and  $\chi^4 = -9.5^\circ$ . <sup>g</sup>  $\chi^0 = -0.1^\circ$ ,  $\chi^1 = -22.1^\circ$ ,  $\chi^2 = 35.7^\circ$ ,  $\chi^3 = -35.2^\circ$  and  $\chi^4 = 22.3^\circ$ . <sup>h</sup>  $\chi^0 = -15.2^\circ$ ,  $\chi^1 = 31.6^\circ$ ,  $\chi^2 = -36.7^\circ$ ,  $\chi^3 = 27.4^\circ$  and  $\chi^4 = -7.5^\circ$ . <sup>i</sup>  $\chi^0 = 1.3^\circ$ ,  $\chi^1 = -23.3^\circ$ ,  $\chi^2 = 36.0^\circ$ ,  $\chi^3 = -34.6^\circ$  and  $\chi^4 = 21.2^\circ$ .

**Table S2. Atomic Coordinates (in Å), energies (in atomic units) and free energies (in atomic units) of the minimum energy conformations calculated for Ac-βtAmp-NHMe, Ac-βcAmp- NHMe, Ac-γtAmp- NHMe, Ac-γcAmp- NHMe.**

**Ac-βtAmp- NHMe**

t-γ<sub>L</sub>[d]

E= -628.6674459 a.u.

|    |   |   |           |           |           |
|----|---|---|-----------|-----------|-----------|
| 1  | 6 | 0 | 0.000000  | 0.000000  | 0.000000  |
| 2  | 6 | 0 | 0.000000  | 0.000000  | 1.517163  |
| 3  | 7 | 0 | 1.211249  | 0.000000  | 2.136426  |
| 4  | 6 | 0 | 2.526446  | -0.046884 | 1.462935  |
| 5  | 1 | 0 | 2.662663  | 0.818353  | 0.806314  |
| 6  | 1 | 0 | 2.606843  | -0.951357 | 0.845598  |
| 7  | 6 | 0 | 3.527966  | -0.063959 | 2.629175  |
| 8  | 1 | 0 | 3.794359  | 0.957771  | 2.911871  |
| 9  | 1 | 0 | 4.438605  | -0.617762 | 2.391015  |
| 10 | 6 | 0 | 2.754507  | -0.714998 | 3.790048  |
| 11 | 7 | 0 | 2.832023  | -2.177057 | 3.715109  |
| 12 | 1 | 0 | 3.164401  | -0.400854 | 4.750957  |
| 13 | 6 | 0 | 1.332810  | -0.131871 | 3.606150  |
| 14 | 1 | 0 | 0.559331  | -0.823830 | 3.955881  |
| 15 | 6 | 0 | 1.141423  | 1.225711  | 4.330792  |
| 16 | 8 | 0 | 2.076682  | 1.814304  | 4.877199  |
| 17 | 7 | 0 | -0.132950 | 1.682284  | 4.329309  |
| 18 | 1 | 0 | -0.805298 | 1.178356  | 3.753998  |
| 19 | 6 | 0 | -0.487282 | 2.964793  | 4.918059  |
| 20 | 1 | 0 | -1.573168 | 3.016537  | 5.019606  |
| 21 | 1 | 0 | -0.145066 | 3.805224  | 4.301739  |
| 22 | 1 | 0 | -0.026345 | 3.060350  | 5.903975  |
| 23 | 8 | 0 | -1.060242 | 0.007490  | 2.161896  |
| 24 | 1 | 0 | -1.034624 | -0.034097 | -0.340275 |
| 25 | 1 | 0 | 0.543668  | -0.860873 | -0.403921 |
| 26 | 1 | 0 | 0.478096  | 0.904172  | -0.392675 |
| 27 | 1 | 0 | 2.402675  | -2.608826 | 4.528871  |
| 28 | 1 | 0 | 2.355599  | -2.542621 | 2.893807  |

c-ε<sub>L</sub>[u]

E= -628.6629998 a.u.

|    |   |   |           |           |           |
|----|---|---|-----------|-----------|-----------|
| 1  | 7 | 0 | 0.000000  | 0.000000  | 0.000000  |
| 2  | 6 | 0 | 0.000000  | 0.000000  | 1.471143  |
| 3  | 6 | 0 | 1.347674  | 0.000000  | -0.550526 |
| 4  | 1 | 0 | -0.100230 | -1.023144 | 1.858974  |
| 5  | 1 | 0 | -0.852488 | 0.576317  | 1.832880  |
| 6  | 6 | 0 | 1.364409  | 0.604694  | 1.810041  |
| 7  | 6 | 0 | 2.273782  | 0.037951  | 0.705108  |
| 8  | 1 | 0 | 1.528059  | 0.908361  | -1.144740 |
| 9  | 6 | 0 | 1.692280  | -1.219564 | -1.436322 |
| 10 | 1 | 0 | 1.714644  | 0.345941  | 2.814204  |
| 11 | 1 | 0 | 1.322396  | 1.699180  | 1.732323  |
| 12 | 1 | 0 | 2.533239  | -0.995184 | 0.967749  |
| 13 | 8 | 0 | 0.906328  | -2.135719 | -1.655773 |
| 14 | 6 | 0 | -1.182929 | 0.118058  | -0.688760 |
| 15 | 8 | 0 | -2.258063 | 0.133554  | -0.088441 |
| 16 | 6 | 0 | -1.115043 | 0.239171  | -2.198962 |
| 17 | 1 | 0 | -2.077568 | 0.615125  | -2.546560 |
| 18 | 1 | 0 | -0.318950 | 0.912025  | -2.535305 |
| 19 | 1 | 0 | -0.928432 | -0.746021 | -2.635132 |
| 20 | 7 | 0 | 2.952737  | -1.162568 | -1.947988 |
| 21 | 1 | 0 | 3.580016  | -0.472364 | -1.543190 |

|    |   |   |          |           |           |
|----|---|---|----------|-----------|-----------|
| 22 | 6 | 0 | 3.507008 | -2.254353 | -2.735812 |
| 23 | 1 | 0 | 4.355443 | -1.881800 | -3.314424 |
| 24 | 1 | 0 | 3.840640 | -3.089945 | -2.107617 |
| 25 | 1 | 0 | 2.742135 | -2.629445 | -3.418085 |
| 26 | 7 | 0 | 3.532110 | 0.720105  | 0.395438  |
| 27 | 1 | 0 | 3.389740 | 1.725067  | 0.309477  |
| 28 | 1 | 0 | 4.219421 | 0.574161  | 1.129957  |

$c-\alpha_L[u]$

$E= -628.6581046$  a.u.

|    |   |   |           |           |           |
|----|---|---|-----------|-----------|-----------|
| 1  | 7 | 0 | 0.000000  | 0.000000  | 0.000000  |
| 2  | 6 | 0 | 0.000000  | 0.000000  | 1.478447  |
| 3  | 6 | 0 | 1.358642  | 0.000000  | -0.565353 |
| 4  | 1 | 0 | -0.205977 | -1.006783 | 1.866801  |
| 5  | 1 | 0 | -0.794121 | 0.656283  | 1.838022  |
| 6  | 6 | 0 | 1.415002  | 0.461859  | 1.821162  |
| 7  | 6 | 0 | 2.279204  | -0.135943 | 0.689228  |
| 8  | 1 | 0 | 1.585517  | 0.943484  | -1.076256 |
| 9  | 6 | 0 | 1.625206  | -1.110483 | -1.597152 |
| 10 | 1 | 0 | 1.745957  | 0.135635  | 2.812048  |
| 11 | 1 | 0 | 1.476062  | 1.557438  | 1.786012  |
| 12 | 1 | 0 | 2.419782  | -1.205555 | 0.890691  |
| 13 | 8 | 0 | 2.390992  | -0.931217 | -2.537949 |
| 14 | 6 | 0 | -1.152591 | 0.328999  | -0.680348 |
| 15 | 8 | 0 | -2.229355 | 0.415186  | -0.090977 |
| 16 | 6 | 0 | -1.036394 | 0.571343  | -2.174690 |
| 17 | 1 | 0 | -0.313238 | 1.361784  | -2.402221 |
| 18 | 1 | 0 | -0.708332 | -0.327746 | -2.705617 |
| 19 | 1 | 0 | -2.019502 | 0.864526  | -2.542192 |
| 20 | 7 | 0 | 0.999224  | -2.297782 | -1.356746 |
| 21 | 1 | 0 | 0.264477  | -2.309002 | -0.663151 |
| 22 | 6 | 0 | 1.146084  | -3.436610 | -2.251910 |
| 23 | 1 | 0 | 2.189581  | -3.517062 | -2.561673 |
| 24 | 1 | 0 | 0.853675  | -4.346603 | -1.723328 |
| 25 | 1 | 0 | 0.530078  | -3.332412 | -3.153696 |
| 26 | 7 | 0 | 3.596535  | 0.424885  | 0.451698  |
| 27 | 1 | 0 | 3.569297  | 1.436262  | 0.350902  |
| 28 | 1 | 0 | 4.243180  | 0.194360  | 1.199167  |

$c-\varepsilon_L[d]$

$E= -628.6581099$  a.u.

|    |   |   |          |           |           |
|----|---|---|----------|-----------|-----------|
| 1  | 6 | 0 | 0.000000 | 0.000000  | 0.000000  |
| 2  | 6 | 0 | 0.000000 | 0.000000  | 1.521397  |
| 3  | 7 | 0 | 1.216974 | 0.000000  | 2.147700  |
| 4  | 6 | 0 | 1.293634 | -0.060894 | 3.619394  |
| 5  | 1 | 0 | 0.707025 | -0.905056 | 3.989935  |
| 6  | 1 | 0 | 0.860626 | 0.850051  | 4.050679  |
| 7  | 6 | 0 | 2.797664 | -0.202527 | 3.899063  |
| 8  | 1 | 0 | 3.063885 | -1.260641 | 3.952895  |
| 9  | 1 | 0 | 3.109045 | 0.290819  | 4.822578  |
| 10 | 6 | 0 | 3.479427 | 0.434908  | 2.675007  |
| 11 | 7 | 0 | 3.594897 | 1.881366  | 2.842482  |
| 12 | 1 | 0 | 4.488397 | 0.040329  | 2.519466  |
| 13 | 6 | 0 | 2.528601 | -0.012884 | 1.509994  |
| 14 | 1 | 0 | 2.572392 | 0.718980  | 0.694239  |
| 15 | 6 | 0 | 2.928776 | -1.404712 | 0.982956  |
| 16 | 8 | 0 | 2.649785 | -2.441100 | 1.578896  |
| 17 | 7 | 0 | 3.668178 | -1.399414 | -0.162486 |
| 18 | 1 | 0 | 3.834005 | -0.527424 | -0.641770 |
| 19 | 6 | 0 | 4.193956 | -2.632039 | -0.737141 |

|    |   |   |           |           |           |
|----|---|---|-----------|-----------|-----------|
| 20 | 1 | 0 | 4.739346  | -2.389063 | -1.650789 |
| 21 | 1 | 0 | 3.382196  | -3.326226 | -0.974291 |
| 22 | 1 | 0 | 4.869796  | -3.128944 | -0.034754 |
| 23 | 8 | 0 | -1.046251 | 0.010775  | 2.169153  |
| 24 | 1 | 0 | -1.037326 | -0.012544 | -0.334088 |
| 25 | 1 | 0 | 0.516345  | -0.878283 | -0.401516 |
| 26 | 1 | 0 | 0.490905  | 0.893861  | -0.402263 |
| 27 | 1 | 0 | 4.032509  | 2.326081  | 2.040502  |
| 28 | 1 | 0 | 2.688416  | 2.319047  | 2.986971  |

### Ac- $\beta$ cAmp- NHMe

t- $\gamma_L$  [d]

E = -628.6688963 a.u.

|    |   |   |           |           |           |
|----|---|---|-----------|-----------|-----------|
| 1  | 7 | 0 | 0.000000  | 0.000000  | 0.000000  |
| 2  | 6 | 0 | 0.000000  | 0.000000  | 1.481052  |
| 3  | 6 | 0 | 1.365148  | 0.000000  | -0.559472 |
| 4  | 1 | 0 | -0.605969 | -0.823903 | 1.871604  |
| 5  | 1 | 0 | -0.424117 | 0.940422  | 1.855526  |
| 6  | 6 | 0 | 1.483258  | -0.128857 | 1.850508  |
| 7  | 6 | 0 | 2.220522  | 0.487794  | 0.648918  |
| 8  | 1 | 0 | 1.398320  | 0.706859  | -1.394850 |
| 9  | 6 | 0 | 1.739137  | -1.406383 | -1.088034 |
| 10 | 1 | 0 | 1.770471  | -1.180257 | 1.943522  |
| 11 | 1 | 0 | 1.727236  | 0.381114  | 2.785418  |
| 12 | 1 | 0 | 2.088607  | 1.577388  | 0.690207  |
| 13 | 8 | 0 | 2.463055  | -2.186396 | -0.459443 |
| 14 | 6 | 0 | -1.092340 | 0.151183  | -0.797452 |
| 15 | 8 | 0 | -0.994655 | 0.182368  | -2.034021 |
| 16 | 6 | 0 | -2.437710 | 0.275102  | -0.108268 |
| 17 | 1 | 0 | -3.204723 | 0.381427  | -0.874891 |
| 18 | 1 | 0 | -2.654374 | -0.609995 | 0.499687  |
| 19 | 1 | 0 | -2.467312 | 1.145652  | 0.556078  |
| 20 | 7 | 0 | 1.205013  | -1.698499 | -2.297245 |
| 21 | 1 | 0 | 0.478367  | -1.070366 | -2.636133 |
| 22 | 6 | 0 | 1.366996  | -3.009477 | -2.908430 |
| 23 | 1 | 0 | 0.727112  | -3.764239 | -2.434460 |
| 24 | 1 | 0 | 1.110852  | -2.938870 | -3.967541 |
| 25 | 1 | 0 | 2.404502  | -3.334072 | -2.807026 |
| 26 | 7 | 0 | 3.646861  | 0.223936  | 0.660729  |
| 27 | 1 | 0 | 4.139036  | 0.786923  | -0.026259 |
| 28 | 1 | 0 | 3.818759  | -0.758526 | 0.459623  |

t- $\alpha_L$  [d]

E = -628.6624383 a.u.

|    |   |   |          |           |          |
|----|---|---|----------|-----------|----------|
| 1  | 6 | 0 | 0.000000 | 0.000000  | 0.000000 |
| 2  | 6 | 0 | 0.000000 | 0.000000  | 1.519675 |
| 3  | 7 | 0 | 1.229839 | 0.000000  | 2.138049 |
| 4  | 6 | 0 | 2.523623 | -0.197481 | 1.444021 |
| 5  | 1 | 0 | 2.743656 | 0.638878  | 0.772116 |
| 6  | 1 | 0 | 2.499307 | -1.114422 | 0.840903 |
| 7  | 6 | 0 | 3.533711 | -0.324046 | 2.587758 |
| 8  | 1 | 0 | 3.899554 | 0.663637  | 2.894460 |
| 9  | 1 | 0 | 4.399462 | -0.934529 | 2.320979 |
| 10 | 6 | 0 | 2.717316 | -0.946660 | 3.729945 |
| 11 | 1 | 0 | 2.523484 | -1.997463 | 3.479443 |
| 12 | 7 | 0 | 3.418475 | -0.932653 | 4.996829 |
| 13 | 6 | 0 | 1.331535 | -0.209963 | 3.590338 |
| 14 | 1 | 0 | 0.506446 | -0.841423 | 3.929311 |
| 15 | 6 | 0 | 1.242668 | 1.067309  | 4.438894 |

|    |   |   |           |           |           |
|----|---|---|-----------|-----------|-----------|
| 16 | 8 | 0 | 1.222910  | 0.983946  | 5.667642  |
| 17 | 7 | 0 | 1.240065  | 2.252911  | 3.774123  |
| 18 | 1 | 0 | 1.094934  | 2.211692  | 2.775543  |
| 19 | 6 | 0 | 1.027871  | 3.516892  | 4.465241  |
| 20 | 1 | 0 | 1.423981  | 4.332465  | 3.855589  |
| 21 | 1 | 0 | 1.553546  | 3.489948  | 5.420834  |
| 22 | 1 | 0 | -0.035528 | 3.698113  | 4.663368  |
| 23 | 8 | 0 | -1.043977 | 0.013756  | 2.169480  |
| 24 | 1 | 0 | -1.030789 | 0.103651  | -0.337979 |
| 25 | 1 | 0 | 0.411104  | -0.937148 | -0.392336 |
| 26 | 1 | 0 | 0.601700  | 0.818156  | -0.410331 |
| 27 | 1 | 0 | 3.501321  | 0.014837  | 5.357517  |
| 28 | 1 | 0 | 2.893744  | -1.444964 | 5.700705  |

$c-\alpha_L[d]$

$E = -628.6619761$  a.u.

|    |   |   |           |           |           |
|----|---|---|-----------|-----------|-----------|
| 1  | 6 | 0 | 0.000000  | 0.000000  | 0.000000  |
| 2  | 6 | 0 | 0.000000  | 0.000000  | 1.518934  |
| 3  | 7 | 0 | 1.221102  | 0.000000  | 2.155732  |
| 4  | 6 | 0 | 1.265130  | 0.209889  | 3.618891  |
| 5  | 1 | 0 | 0.723961  | -0.586711 | 4.135726  |
| 6  | 1 | 0 | 0.763202  | 1.152656  | 3.868956  |
| 7  | 6 | 0 | 2.762424  | 0.239855  | 3.925802  |
| 8  | 1 | 0 | 3.160283  | -0.768778 | 4.081941  |
| 9  | 1 | 0 | 2.993272  | 0.833800  | 4.815161  |
| 10 | 6 | 0 | 3.397001  | 0.820014  | 2.649662  |
| 11 | 1 | 0 | 3.209149  | 1.906844  | 2.631509  |
| 12 | 7 | 0 | 4.810943  | 0.485403  | 2.528283  |
| 13 | 6 | 0 | 2.520404  | 0.217016  | 1.505556  |
| 14 | 1 | 0 | 2.439667  | 0.937528  | 0.686652  |
| 15 | 6 | 0 | 3.162971  | -1.028603 | 0.865940  |
| 16 | 8 | 0 | 4.062212  | -0.877533 | 0.036967  |
| 17 | 7 | 0 | 2.684646  | -2.232896 | 1.259700  |
| 18 | 1 | 0 | 1.930330  | -2.233687 | 1.932228  |
| 19 | 6 | 0 | 3.230780  | -3.496102 | 0.787887  |
| 20 | 1 | 0 | 2.421575  | -4.180886 | 0.518076  |
| 21 | 1 | 0 | 3.859400  | -3.967697 | 1.551861  |
| 22 | 1 | 0 | 3.843299  | -3.293249 | -0.091539 |
| 23 | 8 | 0 | -1.044087 | 0.000741  | 2.168998  |
| 24 | 1 | 0 | -1.013333 | -0.220570 | -0.335725 |
| 25 | 1 | 0 | 0.694975  | -0.730585 | -0.423664 |
| 26 | 1 | 0 | 0.284668  | 0.988131  | -0.380614 |
| 27 | 1 | 0 | 5.131113  | 0.521754  | 1.563396  |
| 28 | 1 | 0 | 5.383128  | 1.109283  | 3.088463  |

$c-\varepsilon_L[d]$

$E = -628.6608904$  a.u.

|    |   |   |           |           |           |
|----|---|---|-----------|-----------|-----------|
| 1  | 7 | 0 | 0.000000  | 0.000000  | 0.000000  |
| 2  | 6 | 0 | 0.000000  | 0.000000  | 1.475168  |
| 3  | 6 | 0 | 1.335881  | 0.000000  | -0.568909 |
| 4  | 1 | 0 | -0.541256 | -0.871758 | 1.852668  |
| 5  | 1 | 0 | -0.519078 | 0.892660  | 1.842252  |
| 6  | 6 | 0 | 1.490458  | -0.002734 | 1.841222  |
| 7  | 6 | 0 | 2.178734  | 0.598998  | 0.601695  |
| 8  | 1 | 0 | 1.396264  | 0.662660  | -1.438846 |
| 9  | 6 | 0 | 1.791249  | -1.413365 | -1.023694 |
| 10 | 1 | 0 | 1.847282  | -1.029779 | 1.989693  |
| 11 | 1 | 0 | 1.703699  | 0.563339  | 2.752830  |
| 12 | 1 | 0 | 1.994409  | 1.679151  | 0.580513  |
| 13 | 8 | 0 | 1.109750  | -2.416774 | -0.832222 |

|    |   |   |           |           |           |
|----|---|---|-----------|-----------|-----------|
| 14 | 6 | 0 | -1.188148 | -0.111539 | -0.672948 |
| 15 | 8 | 0 | -2.253968 | -0.138637 | -0.057421 |
| 16 | 6 | 0 | -1.132669 | -0.182499 | -2.188665 |
| 17 | 1 | 0 | -2.156796 | -0.178355 | -2.561643 |
| 18 | 1 | 0 | -0.591643 | 0.667471  | -2.619628 |
| 19 | 1 | 0 | -0.635653 | -1.103105 | -2.510071 |
| 20 | 7 | 0 | 2.974231  | -1.428208 | -1.698334 |
| 21 | 1 | 0 | 3.569175  | -0.614576 | -1.582618 |
| 22 | 6 | 0 | 3.571947  | -2.675449 | -2.155746 |
| 23 | 1 | 0 | 4.337149  | -2.449983 | -2.901787 |
| 24 | 1 | 0 | 4.026577  | -3.244517 | -1.334727 |
| 25 | 1 | 0 | 2.799117  | -3.299115 | -2.608368 |
| 26 | 7 | 0 | 3.623764  | 0.412057  | 0.462148  |
| 27 | 1 | 0 | 4.129838  | 1.141365  | 0.954788  |
| 28 | 1 | 0 | 3.922270  | -0.478211 | 0.854610  |

$c-\alpha_L[u]$

$E = -628.6598999$  a.u.

|    |   |   |           |           |           |
|----|---|---|-----------|-----------|-----------|
| 1  | 7 | 0 | 0.000000  | 0.000000  | 0.000000  |
| 2  | 6 | 0 | 0.000000  | 0.000000  | 1.484005  |
| 3  | 6 | 0 | 1.360422  | 0.000000  | -0.550230 |
| 4  | 1 | 0 | -0.594101 | -0.832976 | 1.871944  |
| 5  | 1 | 0 | -0.470992 | 0.922287  | 1.840379  |
| 6  | 6 | 0 | 1.490029  | -0.079028 | 1.846392  |
| 7  | 6 | 0 | 2.177732  | 0.591401  | 0.635810  |
| 8  | 1 | 0 | 1.445932  | 0.645902  | -1.426686 |
| 9  | 6 | 0 | 1.852275  | -1.397749 | -0.993047 |
| 10 | 1 | 0 | 1.826674  | -1.118854 | 1.939183  |
| 11 | 1 | 0 | 1.712341  | 0.431955  | 2.787927  |
| 12 | 1 | 0 | 1.907816  | 1.657462  | 0.664897  |
| 13 | 8 | 0 | 2.975259  | -1.534408 | -1.482406 |
| 14 | 6 | 0 | -1.160340 | 0.292070  | -0.676273 |
| 15 | 8 | 0 | -2.226307 | 0.400618  | -0.071509 |
| 16 | 6 | 0 | -1.071839 | 0.468691  | -2.183427 |
| 17 | 1 | 0 | -2.087214 | 0.473188  | -2.579880 |
| 18 | 1 | 0 | -0.598910 | 1.426878  | -2.428654 |
| 19 | 1 | 0 | -0.492562 | -0.322262 | -2.669310 |
| 20 | 7 | 0 | 0.987567  | -2.427065 | -0.806681 |
| 21 | 1 | 0 | 0.078607  | -2.204713 | -0.425087 |
| 22 | 6 | 0 | 1.288929  | -3.795646 | -1.198946 |
| 23 | 1 | 0 | 1.057599  | -4.484443 | -0.380990 |
| 24 | 1 | 0 | 0.715407  | -4.090843 | -2.084950 |
| 25 | 1 | 0 | 2.352436  | -3.854606 | -1.433201 |
| 26 | 7 | 0 | 3.616100  | 0.505233  | 0.482644  |
| 27 | 1 | 0 | 4.099504  | 0.673151  | 1.358461  |
| 28 | 1 | 0 | 3.918347  | -0.374627 | 0.074718  |

$t-\alpha_L [u]$

$E = -628.6551592$  a.u.

|    |   |   |           |           |           |
|----|---|---|-----------|-----------|-----------|
| 1  | 7 | 0 | 0.000000  | 0.000000  | 0.000000  |
| 2  | 6 | 0 | 0.000000  | 0.000000  | 1.478535  |
| 3  | 6 | 0 | 1.379702  | 0.000000  | -0.542791 |
| 4  | 1 | 0 | -0.225393 | -1.002599 | 1.867976  |
| 5  | 1 | 0 | -0.752025 | 0.684755  | 1.873897  |
| 6  | 6 | 0 | 1.430237  | 0.428506  | 1.826901  |
| 7  | 6 | 0 | 2.279575  | -0.217477 | 0.707490  |
| 8  | 1 | 0 | 1.588734  | 0.981138  | -0.981725 |
| 9  | 6 | 0 | 1.685875  | -1.002517 | -1.664071 |
| 10 | 1 | 0 | 1.741464  | 0.104412  | 2.824504  |
| 11 | 1 | 0 | 1.511055  | 1.521529  | 1.779380  |

|    |   |   |           |           |           |
|----|---|---|-----------|-----------|-----------|
| 12 | 7 | 0 | 2.607473  | -1.628212 | 0.908142  |
| 13 | 1 | 0 | 3.225622  | 0.309781  | 0.562627  |
| 14 | 8 | 0 | 2.690399  | -0.843486 | -2.349175 |
| 15 | 6 | 0 | -1.029462 | 0.477986  | -0.780414 |
| 16 | 8 | 0 | -0.860563 | 0.723061  | -1.973092 |
| 17 | 6 | 0 | -2.385630 | 0.660973  | -0.116590 |
| 18 | 1 | 0 | -2.643541 | -0.163778 | 0.554693  |
| 19 | 1 | 0 | -2.403962 | 1.588323  | 0.468180  |
| 20 | 1 | 0 | -3.134400 | 0.740950  | -0.905003 |
| 21 | 7 | 0 | 0.840501  | -2.059575 | -1.798281 |
| 22 | 1 | 0 | -0.063529 | -1.982273 | -1.356141 |
| 23 | 6 | 0 | 0.994761  | -3.002428 | -2.896889 |
| 24 | 1 | 0 | 2.046423  | -3.281319 | -2.981421 |
| 25 | 1 | 0 | 0.400056  | -3.894785 | -2.687725 |
| 26 | 1 | 0 | 0.675328  | -2.569843 | -3.852957 |
| 27 | 1 | 0 | 3.229218  | -1.749331 | 1.701607  |
| 28 | 1 | 0 | 1.789225  | -2.214105 | 1.048477  |

### Ac- $\gamma$ tAmp- NHMe

t- $\gamma_L$  [u]

E = -628.6675146 a.u.

|    |   |   |           |           |           |
|----|---|---|-----------|-----------|-----------|
| 1  | 7 | 0 | 0.000000  | 0.000000  | 0.000000  |
| 2  | 6 | 0 | 0.000000  | 0.000000  | 1.468473  |
| 3  | 6 | 0 | 1.388714  | 0.000000  | -0.520753 |
| 4  | 1 | 0 | 0.003124  | -1.028379 | 1.853417  |
| 5  | 1 | 0 | -0.876045 | 0.516533  | 1.863513  |
| 6  | 6 | 0 | 1.313912  | 0.709973  | 1.830032  |
| 7  | 6 | 0 | 2.264036  | 0.211838  | 0.729030  |
| 8  | 1 | 0 | 1.470911  | 0.823467  | -1.236657 |
| 9  | 6 | 0 | 1.731831  | -1.328139 | -1.250597 |
| 10 | 1 | 0 | 1.660960  | 0.386752  | 2.823409  |
| 11 | 1 | 0 | 2.708623  | -0.746792 | 1.009887  |
| 12 | 1 | 0 | 3.079341  | 0.915738  | 0.537392  |
| 13 | 8 | 0 | 2.460634  | -2.184843 | -0.746253 |
| 14 | 6 | 0 | -1.041614 | 0.336508  | -0.808520 |
| 15 | 8 | 0 | -0.890535 | 0.476610  | -2.031957 |
| 16 | 6 | 0 | -2.407346 | 0.524733  | -0.172575 |
| 17 | 1 | 0 | -2.675217 | -0.306490 | 0.486818  |
| 18 | 1 | 0 | -2.434908 | 1.448588  | 0.416228  |
| 19 | 1 | 0 | -3.140588 | 0.601382  | -0.975306 |
| 20 | 7 | 0 | 1.179704  | -1.444918 | -2.479797 |
| 21 | 1 | 0 | 0.471331  | -0.756096 | -2.728196 |
| 22 | 6 | 0 | 1.334846  | -2.653407 | -3.274007 |
| 23 | 1 | 0 | 0.745649  | -3.486664 | -2.871118 |
| 24 | 1 | 0 | 1.008185  | -2.446948 | -4.295301 |
| 25 | 1 | 0 | 2.384115  | -2.957482 | -3.284193 |
| 26 | 7 | 0 | 1.125506  | 2.162782  | 1.725297  |
| 27 | 1 | 0 | 0.557133  | 2.519235  | 2.489570  |
| 28 | 1 | 0 | 2.017279  | 2.649284  | 1.761161  |

c- $\alpha_L$ [d]

E = -628.663016 a.u.

|   |   |   |          |           |          |
|---|---|---|----------|-----------|----------|
| 1 | 6 | 0 | 0.000000 | 0.000000  | 0.000000 |
| 2 | 6 | 0 | 0.000000 | 0.000000  | 1.520130 |
| 3 | 7 | 0 | 1.220637 | 0.000000  | 2.155210 |
| 4 | 6 | 0 | 1.274747 | 0.198371  | 3.615390 |
| 5 | 1 | 0 | 0.801850 | -0.630133 | 4.147960 |
| 6 | 1 | 0 | 0.727685 | 1.110268  | 3.888952 |

|    |   |   |           |           |           |
|----|---|---|-----------|-----------|-----------|
| 7  | 6 | 0 | 2.775146  | 0.338545  | 3.923022  |
| 8  | 1 | 0 | 3.203171  | -0.661651 | 4.065977  |
| 9  | 7 | 0 | 2.993936  | 1.069582  | 5.163825  |
| 10 | 6 | 0 | 3.340420  | 0.932755  | 2.612816  |
| 11 | 1 | 0 | 3.129103  | 2.009050  | 2.580970  |
| 12 | 1 | 0 | 4.415797  | 0.789535  | 2.485492  |
| 13 | 6 | 0 | 2.529586  | 0.218670  | 1.512233  |
| 14 | 1 | 0 | 2.434903  | 0.849302  | 0.624513  |
| 15 | 6 | 0 | 3.249614  | -1.061544 | 1.034358  |
| 16 | 8 | 0 | 4.316239  | -0.963064 | 0.430041  |
| 17 | 7 | 0 | 2.645912  | -2.241849 | 1.327984  |
| 18 | 1 | 0 | 1.767034  | -2.199772 | 1.825593  |
| 19 | 6 | 0 | 3.199323  | -3.533057 | 0.949345  |
| 20 | 1 | 0 | 2.508425  | -4.078152 | 0.297550  |
| 21 | 1 | 0 | 3.407745  | -4.143460 | 1.834502  |
| 22 | 1 | 0 | 4.131280  | -3.353011 | 0.412102  |
| 23 | 8 | 0 | -1.045228 | -0.000160 | 2.168150  |
| 24 | 1 | 0 | -1.005810 | -0.254404 | -0.334544 |
| 25 | 1 | 0 | 0.718592  | -0.705817 | -0.426510 |
| 26 | 1 | 0 | 0.247448  | 0.998598  | -0.379398 |
| 27 | 1 | 0 | 3.974720  | 1.072049  | 5.427558  |
| 28 | 1 | 0 | 2.687959  | 2.036922  | 5.086552  |

$c-\varepsilon_L[u]$

$E = -628.6580176$  a.u.

|    |   |   |           |           |           |
|----|---|---|-----------|-----------|-----------|
| 1  | 7 | 0 | 0.000000  | 0.000000  | 0.000000  |
| 2  | 6 | 0 | 0.000000  | 0.000000  | 1.469583  |
| 3  | 6 | 0 | 1.354598  | 0.000000  | -0.555487 |
| 4  | 1 | 0 | -0.076105 | -1.026644 | 1.853317  |
| 5  | 1 | 0 | -0.857117 | 0.566874  | 1.837934  |
| 6  | 6 | 0 | 1.359418  | 0.636762  | 1.811204  |
| 7  | 6 | 0 | 2.260857  | 0.055348  | 0.707498  |
| 8  | 1 | 0 | 1.509997  | 0.894627  | -1.176844 |
| 9  | 6 | 0 | 1.681098  | -1.258245 | -1.382913 |
| 10 | 1 | 0 | 1.707414  | 0.322132  | 2.799731  |
| 11 | 1 | 0 | 2.559238  | -0.962433 | 0.977172  |
| 12 | 1 | 0 | 3.158028  | 0.657942  | 0.551011  |
| 13 | 8 | 0 | 1.238979  | -2.363070 | -1.087574 |
| 14 | 6 | 0 | -1.179616 | -0.010057 | -0.699083 |
| 15 | 8 | 0 | -2.263567 | -0.022461 | -0.116158 |
| 16 | 6 | 0 | -1.095967 | -0.002819 | -2.215825 |
| 17 | 1 | 0 | -0.360033 | 0.712405  | -2.598033 |
| 18 | 1 | 0 | -0.822230 | -0.998876 | -2.579476 |
| 19 | 1 | 0 | -2.082391 | 0.252500  | -2.603302 |
| 20 | 7 | 0 | 2.539063  | -1.041505 | -2.421273 |
| 21 | 1 | 0 | 2.835543  | -0.094994 | -2.611150 |
| 22 | 6 | 0 | 3.047036  | -2.110586 | -3.269280 |
| 23 | 1 | 0 | 4.140799  | -2.150626 | -3.233806 |
| 24 | 1 | 0 | 2.642185  | -3.051524 | -2.895312 |
| 25 | 1 | 0 | 2.727995  | -1.973489 | -4.308075 |
| 26 | 7 | 0 | 1.388978  | 2.104848  | 1.784000  |
| 27 | 1 | 0 | 0.874945  | 2.485395  | 2.574704  |
| 28 | 1 | 0 | 0.934051  | 2.460465  | 0.945145  |

### Ac- $\gamma$ Cmp- NHMe.

t- $\gamma_L$ [d]

E = -628.6696739 a.u.

|    |   |   |           |           |           |
|----|---|---|-----------|-----------|-----------|
| 1  | 6 | 0 | 0.000000  | 0.000000  | 0.000000  |
| 2  | 6 | 0 | 0.000000  | 0.000000  | 1.516416  |
| 3  | 7 | 0 | 1.210928  | 0.000000  | 2.136356  |
| 4  | 6 | 0 | 2.521158  | -0.096034 | 1.463069  |
| 5  | 1 | 0 | 2.722287  | 0.782187  | 0.844086  |
| 6  | 1 | 0 | 2.549963  | -0.989997 | 0.827361  |
| 7  | 6 | 0 | 3.561570  | -0.190158 | 2.603298  |
| 8  | 1 | 0 | 4.334605  | -0.911591 | 2.321787  |
| 9  | 6 | 0 | 2.725279  | -0.734117 | 3.794753  |
| 10 | 1 | 0 | 2.669198  | -1.827608 | 3.743716  |
| 11 | 1 | 0 | 3.156489  | -0.450706 | 4.756484  |
| 12 | 6 | 0 | 1.315272  | -0.158154 | 3.604223  |
| 13 | 1 | 0 | 0.531651  | -0.850556 | 3.928390  |
| 14 | 6 | 0 | 1.095525  | 1.193554  | 4.331133  |
| 15 | 8 | 0 | 2.030375  | 1.844360  | 4.810851  |
| 16 | 7 | 0 | -0.195731 | 1.584275  | 4.400048  |
| 17 | 1 | 0 | -0.860317 | 1.063585  | 3.829407  |
| 18 | 6 | 0 | -0.576973 | 2.867902  | 4.970265  |
| 19 | 1 | 0 | -1.655724 | 2.870976  | 5.138359  |
| 20 | 1 | 0 | -0.314631 | 3.701982  | 4.307939  |
| 21 | 1 | 0 | -0.061490 | 3.016403  | 5.921601  |
| 22 | 8 | 0 | -1.060954 | 0.000389  | 2.161287  |
| 23 | 1 | 0 | -1.034487 | 0.031210  | -0.340991 |
| 24 | 1 | 0 | 0.483538  | -0.899890 | -0.396293 |
| 25 | 1 | 0 | 0.540761  | 0.865110  | -0.398080 |
| 26 | 7 | 0 | 4.231670  | 1.095738  | 2.815905  |
| 27 | 1 | 0 | 3.657140  | 1.699494  | 3.405588  |
| 28 | 1 | 0 | 5.102018  | 0.951429  | 3.320416  |

t- $\gamma_L$ [u]

E = -628.6673143 a.u.

|    |   |   |           |           |           |
|----|---|---|-----------|-----------|-----------|
| 1  | 7 | 0 | 0.000000  | 0.000000  | 0.000000  |
| 2  | 6 | 0 | 0.000000  | 0.000000  | 1.464635  |
| 3  | 6 | 0 | 1.393588  | 0.000000  | -0.518990 |
| 4  | 1 | 0 | 0.064870  | -1.026181 | 1.855590  |
| 5  | 1 | 0 | -0.902324 | 0.466586  | 1.863532  |
| 6  | 6 | 0 | 1.288916  | 0.784093  | 1.810388  |
| 7  | 6 | 0 | 2.261180  | 0.322392  | 0.710302  |
| 8  | 1 | 0 | 1.455476  | 0.768137  | -1.296163 |
| 9  | 6 | 0 | 1.757333  | -1.372384 | -1.151755 |
| 10 | 1 | 0 | 1.072030  | 1.852761  | 1.683889  |
| 11 | 1 | 0 | 2.772072  | -0.593120 | 1.026541  |
| 12 | 1 | 0 | 3.023362  | 1.073831  | 0.492873  |
| 13 | 8 | 0 | 2.463369  | -2.196771 | -0.569110 |
| 14 | 6 | 0 | -1.057975 | 0.214006  | -0.829029 |
| 15 | 8 | 0 | -0.906530 | 0.313818  | -2.056298 |
| 16 | 6 | 0 | -2.438059 | 0.324327  | -0.204955 |
| 17 | 1 | 0 | -2.656516 | -0.520701 | 0.455300  |
| 18 | 1 | 0 | -2.533178 | 1.244295  | 0.382961  |
| 19 | 1 | 0 | -3.168150 | 0.350646  | -1.013698 |
| 20 | 7 | 0 | 1.243257  | -1.567225 | -2.388696 |
| 21 | 1 | 0 | 0.533314  | -0.905567 | -2.696557 |
| 22 | 6 | 0 | 1.414129  | -2.827649 | -3.095053 |
| 23 | 1 | 0 | 0.794336  | -3.625193 | -2.666558 |
| 24 | 1 | 0 | 1.137707  | -2.684546 | -4.141702 |
| 25 | 1 | 0 | 2.457966  | -3.143706 | -3.036376 |
| 26 | 7 | 0 | 1.847995  | 0.611950  | 3.141486  |

|    |   |   |          |           |          |
|----|---|---|----------|-----------|----------|
| 27 | 1 | 0 | 1.221021 | 0.938727  | 3.870536 |
| 28 | 1 | 0 | 2.085065 | -0.359107 | 3.328591 |

c- $\alpha_l$ [d]

E = -628.6653972 a.u.

|    |   |   |           |           |           |
|----|---|---|-----------|-----------|-----------|
| 1  | 6 | 0 | 0.000000  | 0.000000  | 0.000000  |
| 2  | 6 | 0 | 0.000000  | 0.000000  | 1.516813  |
| 3  | 7 | 0 | 1.217981  | 0.000000  | 2.149583  |
| 4  | 6 | 0 | 1.264428  | 0.064848  | 3.615093  |
| 5  | 1 | 0 | 0.589354  | -0.678461 | 4.048196  |
| 6  | 1 | 0 | 0.933901  | 1.050244  | 3.970218  |
| 7  | 6 | 0 | 2.736970  | -0.182590 | 3.952677  |
| 8  | 1 | 0 | 3.017103  | 0.347613  | 4.873658  |
| 9  | 6 | 0 | 3.471861  | 0.414118  | 2.736100  |
| 10 | 1 | 0 | 3.595803  | 1.491086  | 2.887123  |
| 11 | 1 | 0 | 4.468476  | -0.012256 | 2.586811  |
| 12 | 6 | 0 | 2.536532  | 0.173663  | 1.518928  |
| 13 | 1 | 0 | 2.544228  | 1.046305  | 0.859093  |
| 14 | 6 | 0 | 2.997017  | -0.987777 | 0.605148  |
| 15 | 8 | 0 | 3.453838  | -0.737502 | -0.511911 |
| 16 | 7 | 0 | 2.870799  | -2.239078 | 1.105061  |
| 17 | 1 | 0 | 2.684465  | -2.322021 | 2.105534  |
| 18 | 6 | 0 | 3.341769  | -3.400495 | 0.366233  |
| 19 | 1 | 0 | 2.899908  | -4.300365 | 0.800213  |
| 20 | 1 | 0 | 4.435522  | -3.489690 | 0.391206  |
| 21 | 1 | 0 | 3.038060  | -3.317933 | -0.679464 |
| 22 | 8 | 0 | -1.043410 | -0.015362 | 2.172336  |
| 23 | 1 | 0 | -1.032775 | 0.097557  | -0.334261 |
| 24 | 1 | 0 | 0.418027  | -0.932621 | -0.392194 |
| 25 | 1 | 0 | 0.597250  | 0.818683  | -0.414160 |
| 26 | 7 | 0 | 2.984303  | -1.635673 | 4.050271  |
| 27 | 1 | 0 | 2.435440  | -2.037782 | 4.807094  |
| 28 | 1 | 0 | 3.962430  | -1.817375 | 4.266699  |

c- $\alpha_l$ [u]

E = -628.6614753 a.u.

|    |   |   |           |           |           |
|----|---|---|-----------|-----------|-----------|
| 1  | 7 | 0 | 0.000000  | 0.000000  | 0.000000  |
| 2  | 6 | 0 | 0.000000  | 0.000000  | 1.471497  |
| 3  | 6 | 0 | 1.370687  | 0.000000  | -0.553336 |
| 4  | 1 | 0 | -0.119353 | -1.018446 | 1.870370  |
| 5  | 1 | 0 | -0.831206 | 0.599965  | 1.842042  |
| 6  | 6 | 0 | 1.384541  | 0.555704  | 1.833342  |
| 7  | 6 | 0 | 2.275926  | -0.010839 | 0.704602  |
| 8  | 1 | 0 | 1.552763  | 0.902101  | -1.146069 |
| 9  | 6 | 0 | 1.718988  | -1.184992 | -1.468567 |
| 10 | 1 | 0 | 1.348871  | 1.648991  | 1.745843  |
| 11 | 1 | 0 | 2.557901  | -1.041217 | 0.956037  |
| 12 | 1 | 0 | 3.197352  | 0.553133  | 0.542483  |
| 13 | 8 | 0 | 2.707185  | -1.122440 | -2.197359 |
| 14 | 6 | 0 | -1.128897 | 0.392779  | -0.690764 |
| 15 | 8 | 0 | -2.214230 | 0.503958  | -0.124462 |
| 16 | 6 | 0 | -0.971417 | 0.679415  | -2.174876 |
| 17 | 1 | 0 | -0.364382 | 1.578081  | -2.334281 |
| 18 | 1 | 0 | -0.488941 | -0.141770 | -2.712965 |
| 19 | 1 | 0 | -1.965240 | 0.849483  | -2.588326 |
| 20 | 7 | 0 | 0.917571  | -2.277262 | -1.358668 |
| 21 | 1 | 0 | 0.103410  | -2.193984 | -0.764874 |
| 22 | 6 | 0 | 1.135795  | -3.502439 | -2.112173 |
| 23 | 1 | 0 | 1.174954  | -4.365630 | -1.440022 |

|    |   |   |          |           |           |
|----|---|---|----------|-----------|-----------|
| 24 | 1 | 0 | 0.340910 | -3.662933 | -2.849243 |
| 25 | 1 | 0 | 2.088806 | -3.409882 | -2.634496 |
| 26 | 7 | 0 | 1.750734 | 0.247606  | 3.208700  |
| 27 | 1 | 0 | 2.600181 | 0.729015  | 3.487776  |
| 28 | 1 | 0 | 1.898695 | -0.750053 | 3.342682  |

t- $\alpha_L$  [u]

E = -628.6606213 a.u.

|    |   |   |           |           |           |
|----|---|---|-----------|-----------|-----------|
| 1  | 7 | 0 | 0.000000  | 0.000000  | 0.000000  |
| 2  | 6 | 0 | 0.000000  | 0.000000  | 1.468961  |
| 3  | 6 | 0 | 1.382391  | 0.000000  | -0.535803 |
| 4  | 1 | 0 | -0.065677 | -1.025356 | 1.864337  |
| 5  | 1 | 0 | -0.838249 | 0.572858  | 1.869906  |
| 6  | 6 | 0 | 1.373666  | 0.613325  | 1.830815  |
| 7  | 6 | 0 | 2.277999  | 0.052477  | 0.724426  |
| 8  | 1 | 0 | 1.515038  | 0.888042  | -1.161422 |
| 9  | 6 | 0 | 1.772220  | -1.187862 | -1.426464 |
| 10 | 1 | 0 | 1.299294  | 1.702435  | 1.715460  |
| 11 | 1 | 0 | 2.602349  | -0.958557 | 1.001874  |
| 12 | 1 | 0 | 3.176919  | 0.648436  | 0.563549  |
| 13 | 8 | 0 | 2.870429  | -1.184323 | -1.978364 |
| 14 | 6 | 0 | -1.039241 | 0.397698  | -0.809348 |
| 15 | 8 | 0 | -0.869991 | 0.572018  | -2.015364 |
| 16 | 6 | 0 | -2.403465 | 0.586018  | -0.163833 |
| 17 | 1 | 0 | -2.429711 | 1.510045  | 0.425531  |
| 18 | 1 | 0 | -3.140536 | 0.667053  | -0.962861 |
| 19 | 1 | 0 | -2.671643 | -0.241697 | 0.500125  |
| 20 | 7 | 0 | 0.898572  | -2.226677 | -1.494546 |
| 21 | 1 | 0 | -0.036864 | -2.060693 | -1.153238 |
| 22 | 6 | 0 | 1.125173  | -3.357270 | -2.383335 |
| 23 | 1 | 0 | 2.196052  | -3.561141 | -2.422425 |
| 24 | 1 | 0 | 0.601610  | -4.235056 | -1.996100 |
| 25 | 1 | 0 | 0.775980  | -3.149549 | -3.402203 |
| 26 | 7 | 0 | 1.897599  | 0.354710  | 3.162269  |
| 27 | 1 | 0 | 1.332369  | 0.781488  | 3.889986  |
| 28 | 1 | 0 | 1.972818  | -0.640934 | 3.355256  |

c- $\epsilon_L$  [d]

E = -628.6601957 a.u.

|    |   |   |          |           |           |
|----|---|---|----------|-----------|-----------|
| 1  | 6 | 0 | 0.000000 | 0.000000  | 0.000000  |
| 2  | 6 | 0 | 0.000000 | 0.000000  | 1.519986  |
| 3  | 7 | 0 | 1.216816 | 0.000000  | 2.149571  |
| 4  | 6 | 0 | 1.286584 | -0.023138 | 3.619668  |
| 5  | 1 | 0 | 0.619939 | -0.793928 | 4.014200  |
| 6  | 1 | 0 | 0.955221 | 0.942273  | 4.026882  |
| 7  | 6 | 0 | 2.774371 | -0.301602 | 3.927801  |
| 8  | 1 | 0 | 3.070807 | 0.214481  | 4.846818  |
| 9  | 6 | 0 | 3.482716 | 0.331871  | 2.712117  |
| 10 | 1 | 0 | 3.577919 | 1.412743  | 2.858729  |
| 11 | 1 | 0 | 4.480852 | -0.086638 | 2.562772  |
| 12 | 6 | 0 | 2.528996 | 0.077752  | 1.512782  |
| 13 | 1 | 0 | 2.568084 | 0.921603  | 0.810888  |
| 14 | 6 | 0 | 2.910188 | -1.210311 | 0.749640  |
| 15 | 8 | 0 | 2.558319 | -2.330556 | 1.113849  |
| 16 | 7 | 0 | 3.697191 | -1.014830 | -0.341091 |
| 17 | 1 | 0 | 3.964780 | -0.074770 | -0.592268 |
| 18 | 6 | 0 | 4.242413 | -2.130680 | -1.105520 |
| 19 | 1 | 0 | 4.975825 | -2.692815 | -0.517926 |

|                                     |   |   |           |           |           |
|-------------------------------------|---|---|-----------|-----------|-----------|
| 20                                  | 1 | 0 | 4.723334  | -1.739680 | -2.003847 |
| 21                                  | 1 | 0 | 3.440634  | -2.815074 | -1.393553 |
| 22                                  | 8 | 0 | -1.046660 | -0.004916 | 2.167540  |
| 23                                  | 1 | 0 | -1.033886 | 0.086085  | -0.333970 |
| 24                                  | 1 | 0 | 0.423457  | -0.931885 | -0.388891 |
| 25                                  | 1 | 0 | 0.578837  | 0.834062  | -0.412424 |
| 26                                  | 7 | 0 | 3.152084  | -1.707774 | 4.075804  |
| 27                                  | 1 | 0 | 2.725385  | -2.104956 | 4.908492  |
| 28                                  | 1 | 0 | 2.838231  | -2.254740 | 3.273941  |
| <b>c-<math>\epsilon_L</math>[u]</b> |   |   |           |           |           |
| <b>E = -628.6571276 a.u.</b>        |   |   |           |           |           |
| 1                                   | 7 | 0 | 0.000000  | 0.000000  | 0.000000  |
| 2                                   | 6 | 0 | 0.000000  | 0.000000  | 1.466598  |
| 3                                   | 6 | 0 | 1.353447  | 0.000000  | -0.558033 |
| 4                                   | 1 | 0 | -0.091028 | -1.019864 | 1.862670  |
| 5                                   | 1 | 0 | -0.842202 | 0.591461  | 1.831513  |
| 6                                   | 6 | 0 | 1.376670  | 0.579994  | 1.810031  |
| 7                                   | 6 | 0 | 2.259262  | -0.012760 | 0.700633  |
| 8                                   | 1 | 0 | 1.521500  | 0.919216  | -1.139602 |
| 9                                   | 6 | 0 | 1.658333  | -1.226472 | -1.441290 |
| 10                                  | 1 | 0 | 1.331142  | 1.675749  | 1.680567  |
| 11                                  | 1 | 0 | 2.504273  | -1.044457 | 0.973862  |
| 12                                  | 1 | 0 | 3.191277  | 0.537076  | 0.537785  |
| 13                                  | 8 | 0 | 1.195057  | -2.335091 | -1.201518 |
| 14                                  | 6 | 0 | -1.179802 | 0.041956  | -0.695644 |
| 15                                  | 8 | 0 | -2.262819 | 0.053411  | -0.110395 |
| 16                                  | 6 | 0 | -1.100143 | 0.072317  | -2.212364 |
| 17                                  | 1 | 0 | -0.336810 | 0.763184  | -2.585411 |
| 18                                  | 1 | 0 | -0.869957 | -0.927943 | -2.594093 |
| 19                                  | 1 | 0 | -2.076427 | 0.375629  | -2.590860 |
| 20                                  | 7 | 0 | 2.528857  | -0.978424 | -2.463279 |
| 21                                  | 1 | 0 | 2.813093  | -0.024575 | -2.633455 |
| 22                                  | 6 | 0 | 2.998333  | -2.014275 | -3.372410 |
| 23                                  | 1 | 0 | 2.552737  | -1.905238 | -4.367858 |
| 24                                  | 1 | 0 | 4.088297  | -1.978467 | -3.463138 |
| 25                                  | 1 | 0 | 2.701975  | -2.979332 | -2.960106 |
| 26                                  | 7 | 0 | 1.827734  | 0.179174  | 3.141280  |
| 27                                  | 1 | 0 | 1.182710  | 0.503643  | 3.857637  |
| 28                                  | 1 | 0 | 2.737163  | 0.580282  | 3.355510  |
